# Supplementary material
Source: PubMed Central journal article supplement (PMC3809387)
Supplement: Supp_Fig1.pdf [file Supp_Fig1.pdf]

## Supplementary Data

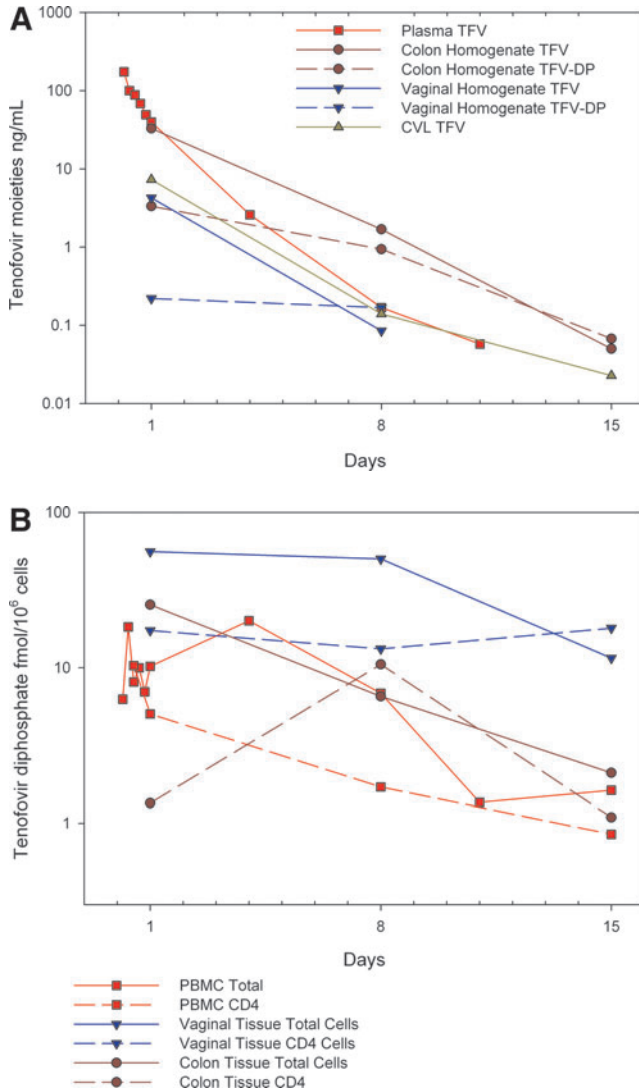

**SUPPLEMENTARY FIG. S1.** Median log<sub>10</sub> concentration versus time curve for TFV and TFV-DP in multiple matrices using color to distinguish the different anatomic locations (blood plasma, tissue, and cervicovaginal fluid) and line characteristics to differentiate among drug moieties (TFV and TFV-DP). **(A)** TFV (solid lines) in blood plasma, tissue homogenates, and cervicovaginal lavage fluid and TFV-DP (dashed lines) in tissue homogenates. Symbols are red square, blood plasma; brown circle, colon tissue; blue down triangle, vaginal tissue; yellow up triangle, cervicovaginal lavage fluid. Units indicated on the y-axis (ng/ml) assume equivalence with ng/g for tissue, which assumes similar specific gravity of plasma, tissue homogenate, and cervicovaginal fluid. **(B)** TFV-DP in cells removed from tissue biopsies intact before processing: total cells (solid lines) and CD4<sup>+</sup> cell subsets (dashed lines). Symbols and colors represent different anatomic locations as in **(A)**. As these values are medians at a given point in time, the apparent slopes will differ from individual slopes, which are derived from all values of a given individual.
